# Supplementary material for: Synthesis of Zn3V2O8/rGO Nanocomposite for Photocatalytic Hydrogen Production
Source: MDPI journal article supplement (doi:10.3390/inorganics11030093), 2023-02-24
Supplement: s1 [file s1]

## **Supporting Information**

### **Synthesis Of $\text{Zn}_3\text{V}_2\text{O}_8/\text{rGO}$ Nanocomposite for Photocatalytic Hydrogen Production**

Fahad A Alharthi\*, Alanood Sulaiman Ababtain, Hamdah S. Alanazi, Wedyan Saud Al-Nafaei,  
Imran Hasan\*

\* Department of Chemistry, College of Science, King Saud University, Riyadh-11451, KSA

Email: [fharthi@ksu.edu.sa](mailto:fharthi@ksu.edu.sa)

Email: [442203329@student.ksu.edu.sa](mailto:442203329@student.ksu.edu.sa)

Email: [hsenzi@ksu.edu.sa](mailto:hsenzi@ksu.edu.sa)

Email: [wedosmoon@gmail.com](mailto:wedosmoon@gmail.com)

Email: [iabdulateef@ksu.edu.sa](mailto:iabdulateef@ksu.edu.sa)

#### **\*Corresponding Author**

Imran Hasan (I.H.)    Email: [iabdulateef@ksu.edu.sa](mailto:iabdulateef@ksu.edu.sa)

Fahad A Alharthi (F.A.A.)    Email: [fharthi@ksu.edu.sa](mailto:fharthi@ksu.edu.sa)

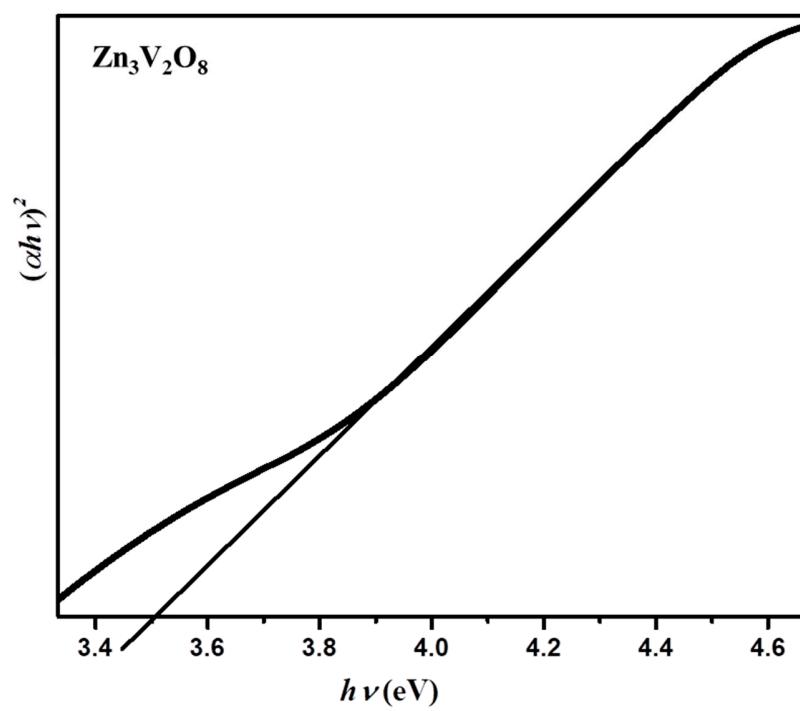

**Figure S1.** Tauc plot of  $\text{Zn}_3\text{V}_2\text{O}_8$ .

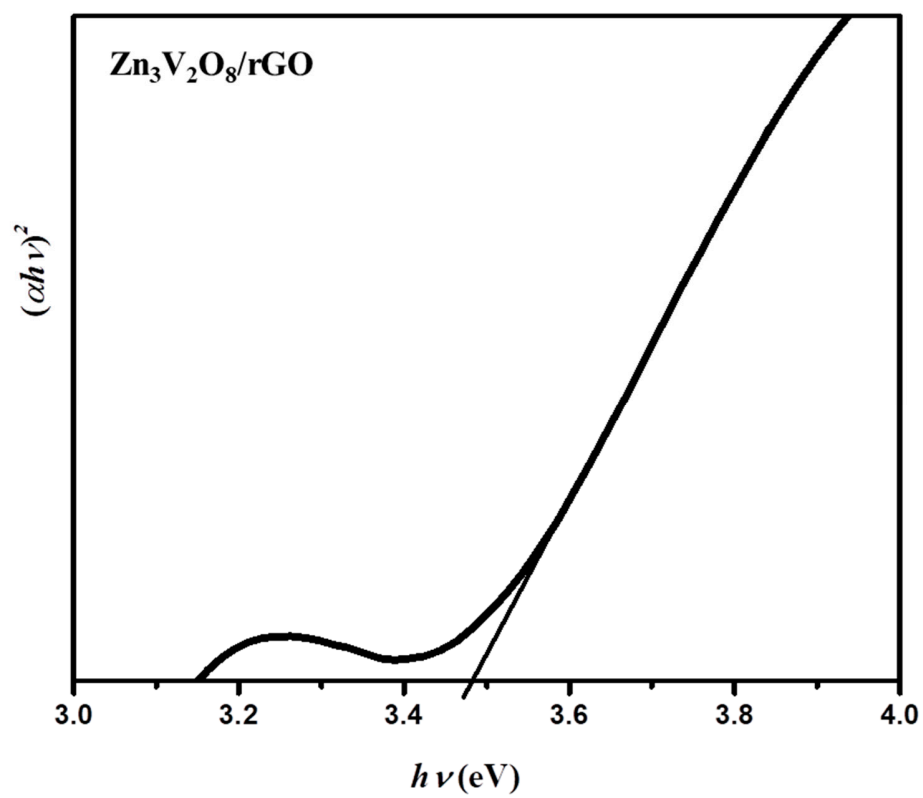

**Figure S2.** Tauc plot of  $\text{Zn}_3\text{V}_2\text{O}_8/\text{rGO}$ .

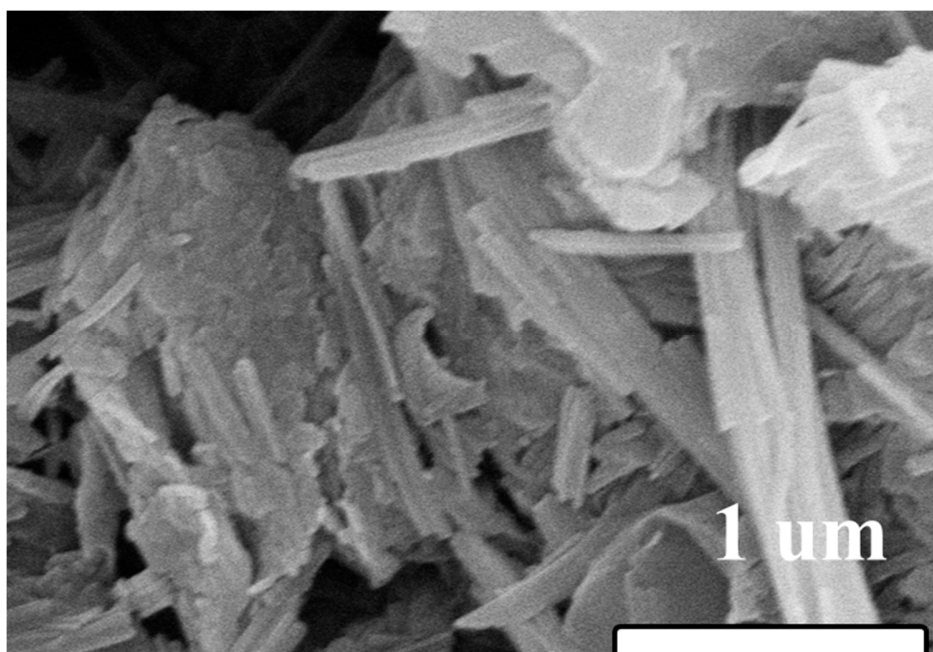

**Figure S3.** SEM image of Zn<sub>3</sub>V<sub>2</sub>O<sub>8</sub>/rGO after photo-catalytic experiment.
